# Supplementary material for: Proteomics of intracellular freezing survival
Source: PLOS journal article supplement (doi:10.1371/journal.pone.0233048), 2020-05-26
Supplement: S8 (10.1371/journal.pone.0233048.s008) [file journal.pone.0233048.s008]

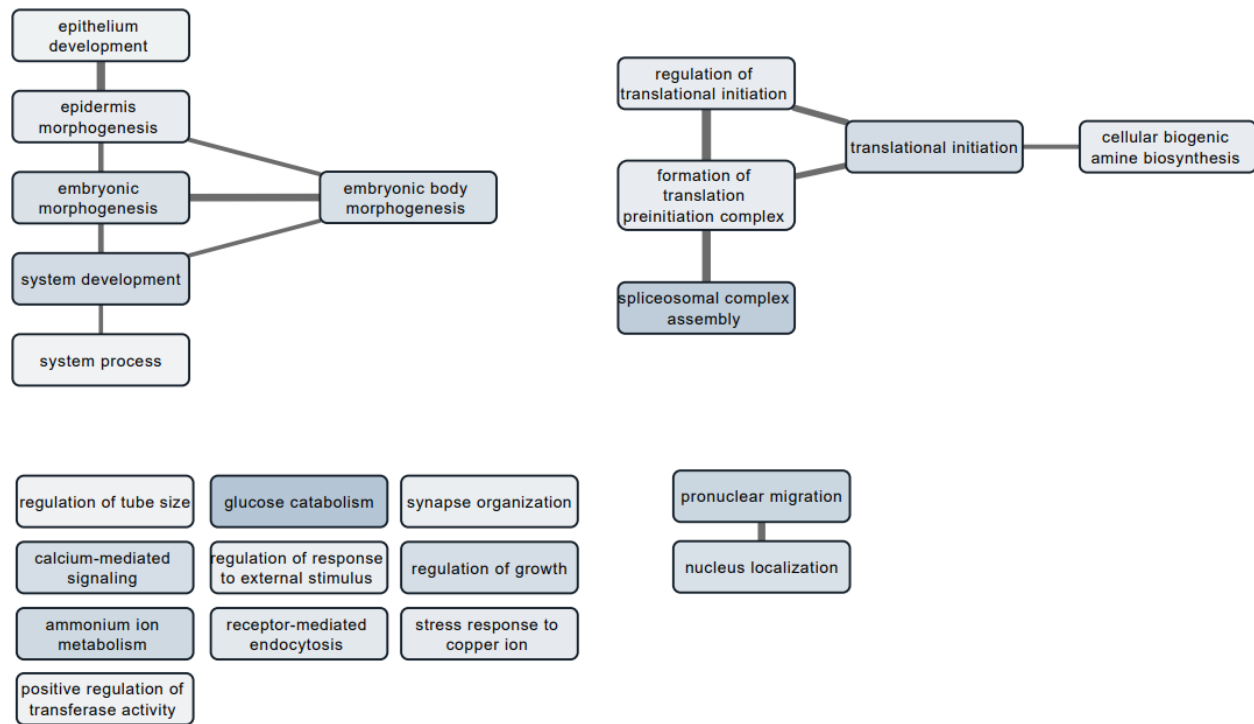

Supplementary Figure 7. Enriched GO term networks of biological processes for long term freezing.
