# Supplementary material for: Proteomics of intracellular freezing survival
Source: PLOS journal article supplement (doi:10.1371/journal.pone.0233048), 2020-05-26
Supplement: S13 (10.1371/journal.pone.0233048.s013) [file journal.pone.0233048.s013]

REVIGO Gene Ontology treemap

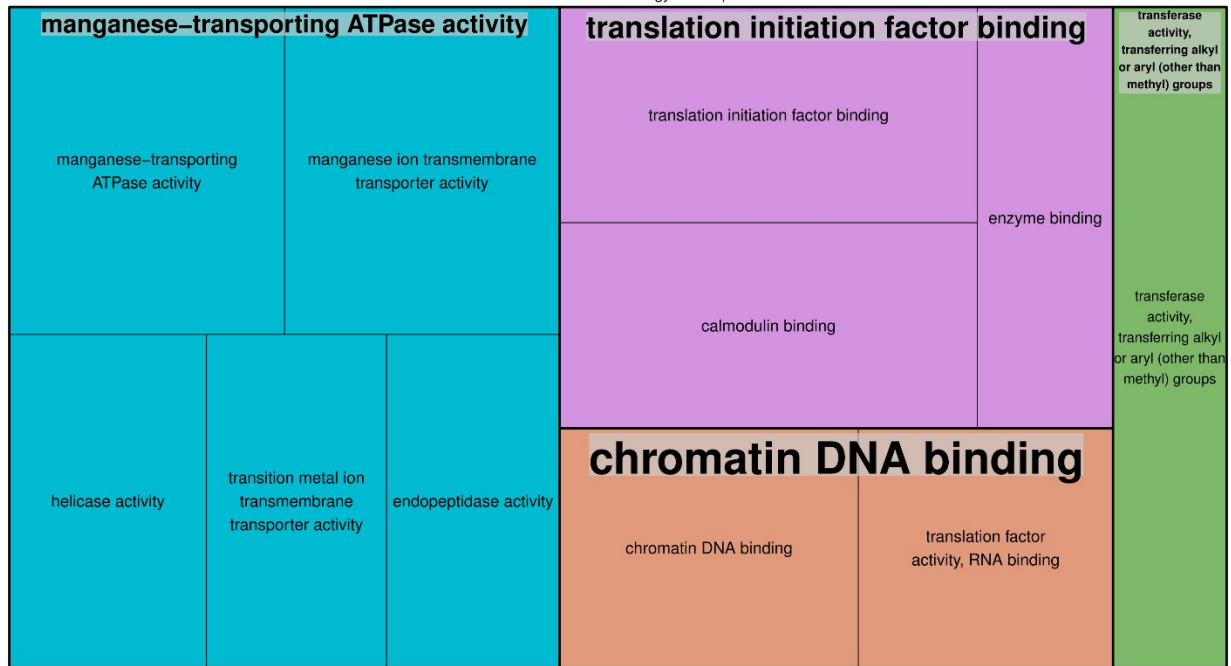

Supplementary Figure 12. Enriched GO term tree map of molecular functions for short term freezing.
