# Supplementary material for: Proteomics of intracellular freezing survival
Source: PLOS journal article supplement (doi:10.1371/journal.pone.0233048), 2020-05-26
Supplement: S16 (10.1371/journal.pone.0233048.s016) [file journal.pone.0233048.s016]

REVIGO Gene Ontology treemap

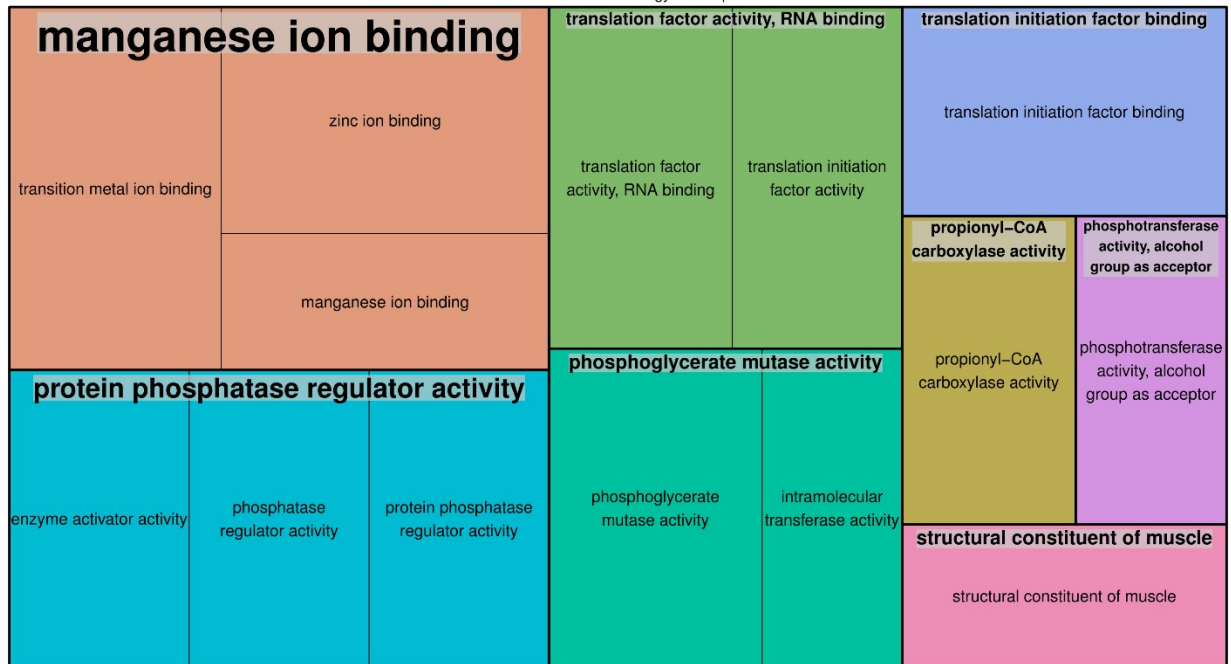

Supplementary Figure 15. Enriched GO term tree map of molecular functions for long term freezing.
